# Supplementary material
Source: HighWire-hosted journal article supplement (http://ghspjournal.org/highwire/filestream/6406/field_highwire_adjunct_files/3/GHSP-D-21-00706-supplement4.pdf)
Supplement: GHSP-D-21-00706-supplement4.pdf [file GHSP-D-21-00706-supplement4.pdf]

**Supplement to:** Pope S, Augusto O, Fernandes Q, et al. Primary health care management effectiveness as a driver of family planning service readiness: a cross-sectional analysis in central Mozambique. *Glob Health Sci Pract.* 2022;10(Suppl 1):e2100706. <https://doi.org/10.9745/GHSP-D-21-00706>

#### **Supplement 4. Family planning facility readiness component indicators based on the Service Availability and Readiness Assessment framework**

The following family planning facility readiness component indicators are based on the Service Availability and Readiness Assessment (SARA) survey.

| <b>Questions to health facility:</b>               |                                                                                                                         |                                                                        |            |  |
|----------------------------------------------------|-------------------------------------------------------------------------------------------------------------------------|------------------------------------------------------------------------|------------|--|
|                                                    |                                                                                                                         | <b>0</b>                                                               | <b>1</b>   |  |
| <b>Family planning Provision</b>                   | 1. Does this facility provide or prescribe any of the following modern methods of family planning?                      |                                                                        |            |  |
|                                                    | a. Combined estrogen progesterone oral contraceptive pills                                                              | No                                                                     | Yes        |  |
|                                                    | b. Progestin-only contraceptive pills                                                                                   | No                                                                     | Yes        |  |
|                                                    | c. Combined estrogen progesterone injectable contraceptives                                                             | No                                                                     | Yes        |  |
|                                                    | d. Progestin-only injectable contraceptives                                                                             | No                                                                     | Yes        |  |
|                                                    | e. Male condoms                                                                                                         | No                                                                     | Yes        |  |
|                                                    | f. Female condoms                                                                                                       | No                                                                     | Yes        |  |
|                                                    | g. Intrauterine contraceptive device (IUCD)                                                                             | No                                                                     | Yes        |  |
|                                                    | h. Implants                                                                                                             | No                                                                     | Yes        |  |
|                                                    | i. Emergency contraceptive pills                                                                                        | No                                                                     | Yes        |  |
|                                                    | j. Male sterilization                                                                                                   | No                                                                     | Yes        |  |
|                                                    | k. Female sterilization                                                                                                 | No                                                                     | Yes        |  |
|                                                    | <b>Provision readiness score:</b>                                                                                       |                                                                        | _____ / 11 |  |
|                                                    | <b>Guidelines &amp; Checklists</b>                                                                                      | 1. Are any of the following documents available in the facility today? |            |  |
| a. National family planning guidelines             |                                                                                                                         | No                                                                     | Yes        |  |
| b. Family planning checklists and/or job-aids      |                                                                                                                         | No                                                                     | Yes        |  |
| <b>Guideline &amp; Check-list readiness score:</b> |                                                                                                                         | _____ / 2                                                              |            |  |
| <b>Training</b>                                    | 1. Have you or any provider(s) of family planning services received any family planning training in the last two years? | No                                                                     | Yes        |  |
|                                                    | <b>Training readiness score:</b>                                                                                        |                                                                        | _____ / 1  |  |

**Supplement to:** Pope S, Augusto O, Fernandes Q, et al. Primary health care management effectiveness as a driver of family planning service readiness: a cross-sectional analysis in central Mozambique. *Glob Health Sci Pract.* 2022;10(Suppl 1):e2100706. <https://doi.org/10.9745/GHSP-D-21-00706>

|                                               |                                                                                                                                                                                                                                                                                                                                        |              |
|-----------------------------------------------|----------------------------------------------------------------------------------------------------------------------------------------------------------------------------------------------------------------------------------------------------------------------------------------------------------------------------------------|--------------|
| <b>Stock Readiness</b>                        |                                                                                                                                                                                                                                                                                                                                        |              |
|                                               | 1. Are any of the following reproductive health medicines and commodities available in this service site today?<br><b>Score conversion: 1 = At least one valid   0.66 = Available but not valid   0.33 = Available but not seen   0 = Not available today or Never available</b>                                                       | Score:       |
|                                               | a. Combined estrogen progesterone oral contraceptive pills                                                                                                                                                                                                                                                                             |              |
|                                               | b. Progestin-only contraceptive pills                                                                                                                                                                                                                                                                                                  |              |
|                                               | c. Combined estrogen progesterone injectable contraceptives                                                                                                                                                                                                                                                                            |              |
|                                               | d. Progestin-only injectable contraceptives                                                                                                                                                                                                                                                                                            |              |
|                                               | e. Male condoms                                                                                                                                                                                                                                                                                                                        |              |
|                                               | f. Female condoms                                                                                                                                                                                                                                                                                                                      |              |
|                                               | g. Implant                                                                                                                                                                                                                                                                                                                             |              |
|                                               | h. Emergency contraceptive pills                                                                                                                                                                                                                                                                                                       |              |
|                                               | i. Intrauterine contraceptive device (IUCD)                                                                                                                                                                                                                                                                                            |              |
|                                               | <b>Stock readiness score:</b>                                                                                                                                                                                                                                                                                                          | _____ / 9    |
| <b>Stockout</b>                               |                                                                                                                                                                                                                                                                                                                                        | <b>Score</b> |
|                                               | 1. For each of the following items, please check in the facility records if there has been a stock-out in the past three months:<br><b>Score conversion: 1 = No stockouts   0 = At least one stockout for any period of time OR Stock registry not available OR Stock registry not filled in OR Product not provided or prescribed</b> | Score:       |
|                                               | a. Female condoms                                                                                                                                                                                                                                                                                                                      |              |
|                                               | b. Implants                                                                                                                                                                                                                                                                                                                            |              |
|                                               | c. Emergency contraceptive pills                                                                                                                                                                                                                                                                                                       |              |
| <b>Stockout readiness score:</b>              | _____ / 3                                                                                                                                                                                                                                                                                                                              |              |
| <b>TOTAL FAMILY PLANNING READINESS SCORE:</b> |                                                                                                                                                                                                                                                                                                                                        |              |
